# Supplementary material for: Nonreciprocal charge transport in noncentrosymmetric superconductors
Source: PubMed Central journal article supplement — Sci Adv. 2017 Apr 21;3(4):e1602390. doi: 10.1126/sciadv.1602390 (PMC5400453; doi:10.1126/sciadv.1602390), 2017-04-21
Supplement: 1602390_SM.pdf [file 1602390_SM.pdf]

## Supplementary Materials for **Nonreciprocal charge transport in noncentrosymmetric superconductors**

Ryohei Wakatsuki, Yu Saito, Shintaro Hoshino, Yuki M. Itahashi, Toshiya Ideue, Motohiko Ezawa,  
Yoshihiro Iwasa, Naoto Nagaosa

Published 21 April 2017, *Sci. Adv.* **3**, e1602390 (2017)  
DOI: 10.1126/sciadv.1602390

### **This PDF file includes:**

- Effect of the Rashba term

### Effect of the Rashba term

We discuss the effect of the Rashba term in the nonreciprocal current. The Rashba term creates the term linear in momentum in the GL free energy (16). Therefore, the Eqs. 28, 30, and 31 in the main text are modified to

$$F = \sum_{\mathbf{q}} \left[ a + \frac{\hbar^2 \mathbf{q}^2}{4m} + \alpha_R \hat{\mathbf{z}} \cdot (\mathbf{B} \times \mathbf{q}) + \Lambda B q_x (q_x^2 - 3q_y^2) \right] |\Psi_{\mathbf{q}}|^2 + \frac{b}{2} |\Psi_{\mathbf{q}}|^4 \quad (\text{S1})$$

$$\eta_{\mathbf{q}}(t) = a + \frac{\hbar^2}{4m} \left( \mathbf{q} - \frac{2e}{\hbar} \mathbf{E} t \right)^2 + \alpha_R \hat{\mathbf{z}} \cdot [\mathbf{B} \times (\mathbf{q} - \frac{2e}{\hbar} \mathbf{E} t)] + \Lambda B \left( q_x - \frac{2e}{\hbar} E_x t \right) \times \left[ \left( q_x - \frac{2e}{\hbar} E_x t \right)^2 - 3 \left( q_y - \frac{2e}{\hbar} E_y t \right)^2 \right] \quad (\text{S2})$$

$$j_{\mathbf{q}}(t) = -\frac{e\hbar}{m} \left( \mathbf{q} - \frac{2e}{\hbar} \mathbf{E} t \right) - \frac{2e}{\hbar} \alpha_R (\hat{\mathbf{z}} \times \mathbf{B}) - \frac{6e\Lambda B}{\hbar} F \left( \mathbf{q} - \frac{2e}{\hbar} \mathbf{E} t \right) \quad (\text{S3})$$

where  $\hat{\mathbf{z}}$  is the unit vector along the z direction and  $\alpha_R$  represents the strength of the Rashba spin-orbit interaction. By substituting these equation into Eq. 18 in the main text and performing the integration in the exponential function and over the momentum, we obtain

$$\mathbf{j} = \int_{-\infty}^0 du \frac{e^2 k_B T_c}{\pi \hbar^2} \left[ \mathbf{E} + \frac{4em\Lambda B}{\hbar^3} u \mathbf{F}(\mathbf{E}) \right] \exp \left[ \frac{12amu + e^2 \mathbf{E}^2 u^3}{6\hbar m \Gamma} \right] \quad (\text{S4})$$

which does not contain  $\alpha_R$  in the lowest order. Therefore, we reach to Eq. 32 in the main text.
